# Supplementary material for: Hydroxyl-functionalized poly(trimethylene carbonate) electrolytes for 3D-electrode configurations
Source: Royal Society of Chemistry journal article supplement (doi:10.1039/c5py00446b), 2015-01-01
Supplement: c5py00446b1.pdf [file c5py00446b1.pdf]

# Electronic Supplementary Information for

## Hydroxyl-functionalized poly(trimethylene carbonate) electrolytes for 3D-electrode configurations

*Jonas Mindemark,\* Bing Sun, Daniel Brandell*

Department of Chemistry – Ångström Laboratory, Uppsala University, Box 538, SE-751 21 Uppsala, Sweden

\* Corresponding author. Tel: +46 18 471 37 36. Fax: +46 18 471 34 77. E-mail: [jonas.mindemark@kemi.uu.se](mailto:jonas.mindemark@kemi.uu.se).

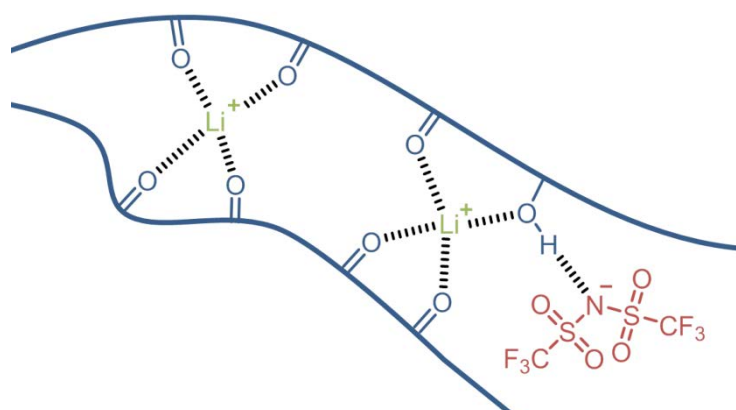

**Figure S1.** Schematic illustration of proposed polymer–ion interactions between PTMC-OH and LiTFSI. Note that the  $\text{Li}^+$  coordination number has been arbitrarily set to 4 and that the polymer structure has been greatly simplified, showing only selected functional groups that participate in ion coordination.

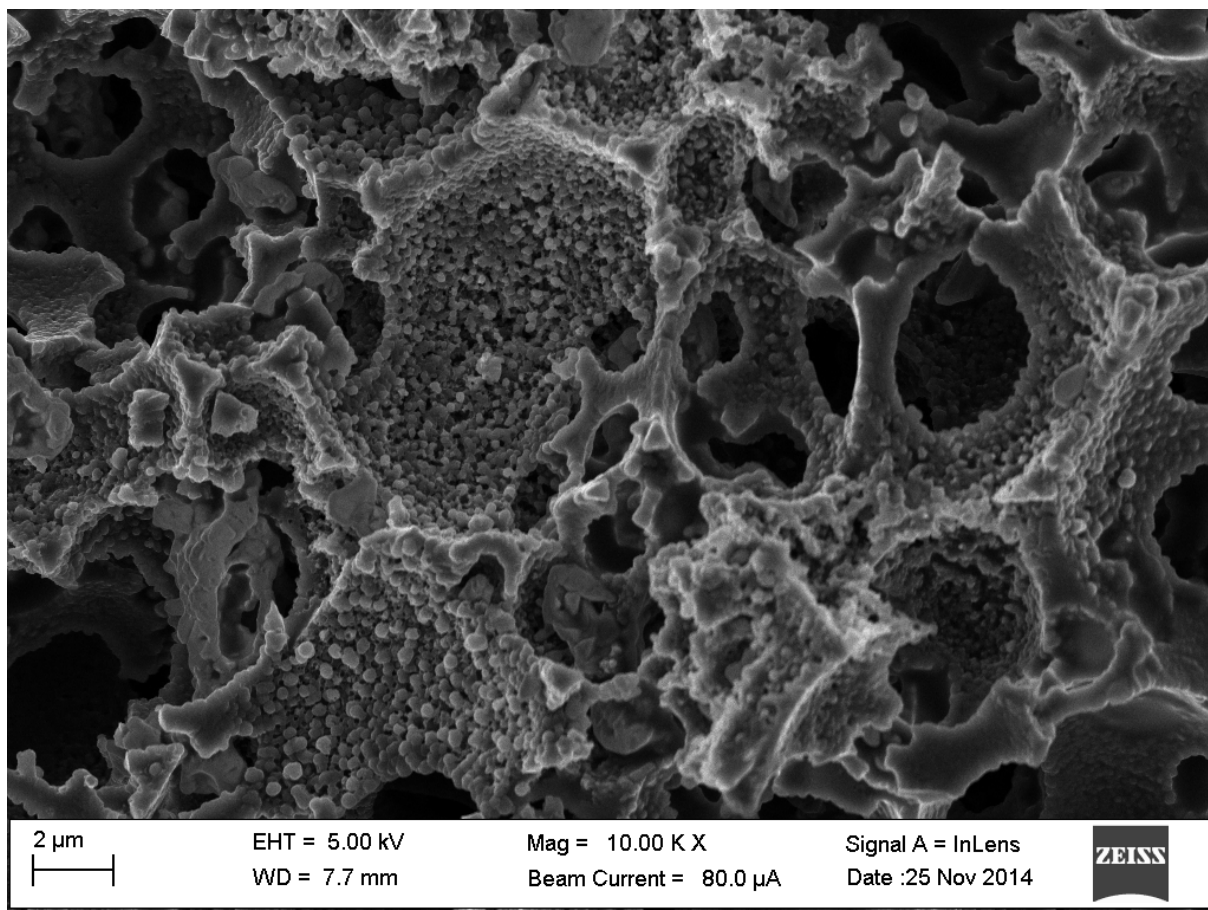

Figure S2. Pristine  $\text{LiFePO}_4$ -coated ultraporous carbon foam.

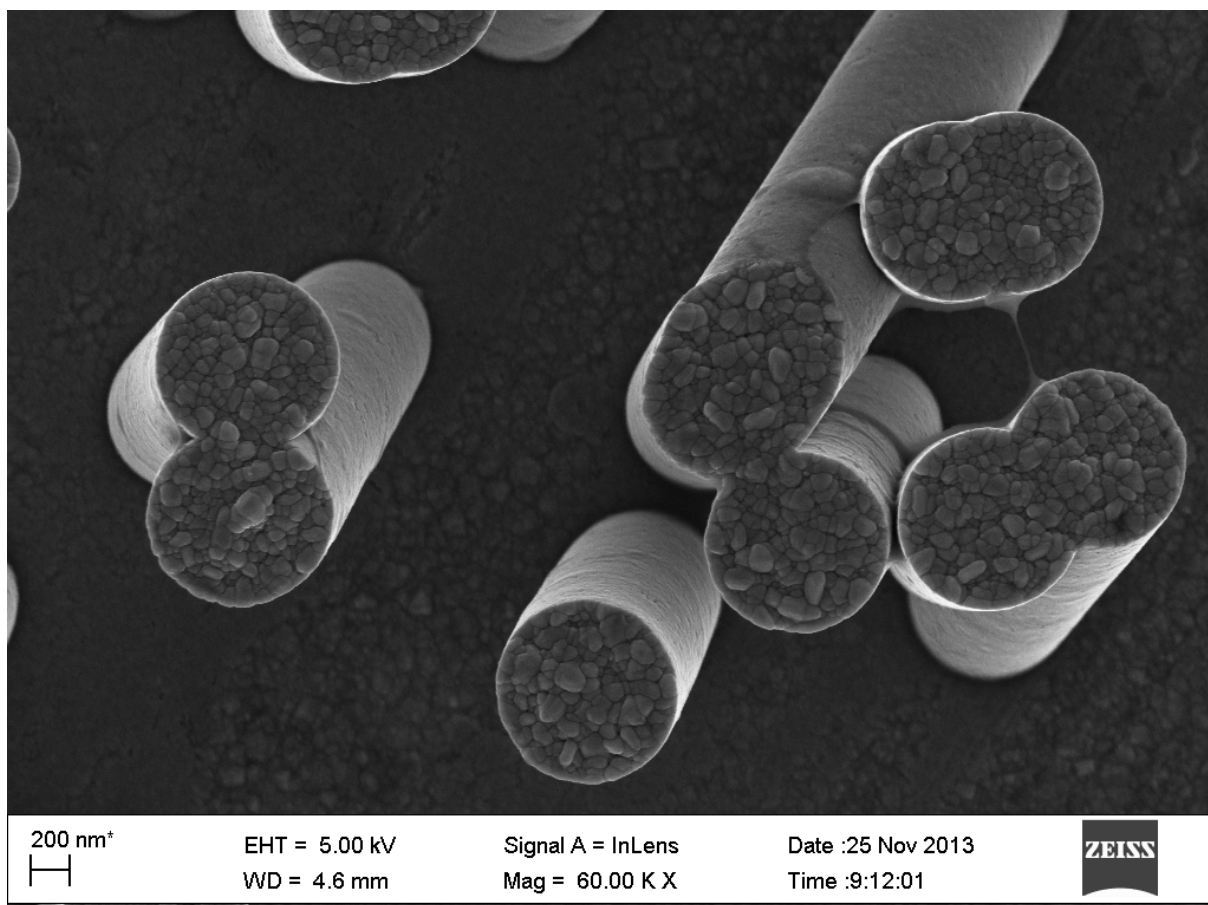

Figure S3. Pristine  $\text{Cu}_2\text{O}$ -coated Cu nanopillars
